# Supplementary material for: Creation of a Patient-Centered Journey Map to Improve the Patient Experience: A Mixed Methods Approach
Source: PubMed Central journal article supplement — Mayo Clin Proc Innov Qual Outcomes. 2019 Sep 24;3(4):466–75. doi: 10.1016/j.mayocpiqo.2019.07.004 (PMC6978601; doi:10.1016/j.mayocpiqo.2019.07.004), 2019-09-24

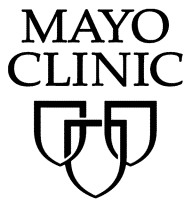

# MEDICAL PRACTICE SURVEY

We thank you in advance for completing this questionnaire. When you have finished, please mail it in the enclosed envelope.

For your visit with Precode 3 (PROVNAM1)

For your visit on Precode 4 (SVC\_DATE)

## BACKGROUND QUESTIONS

1. If someone other than the patient is completing the survey, please check here: .....
2. Was this your first visit here? .....  Yes  No
3. How many **minutes** did you wait after your scheduled appointment time before you were called to an exam room? 

|  |  |  |
|--|--|--|
|  |  |  |
|--|--|--|

 minutes

4. How many **minutes** did you wait in the exam room before you were seen by a doctor, physician assistant (PA), nurse practitioner (NP), or midwife? 

|  |  |  |
|--|--|--|
|  |  |  |
|--|--|--|

 minutes

**INSTRUCTIONS:** Please rate the services you received from our practice. Select the response that best describes your experience. If a question does not apply to you, please skip to the next question. Space is provided for you to comment on good or bad things that may have happened to you.

Please use black or blue ink to fill in the circle completely.  
Example: ●

| <b>ACCESS</b>                                               | very poor             | poor                  | fair                  | good                  | very good             |
|-------------------------------------------------------------|-----------------------|-----------------------|-----------------------|-----------------------|-----------------------|
|                                                             | <b>1</b>              | <b>2</b>              | <b>3</b>              | <b>4</b>              | <b>5</b>              |
| 1. Ease of getting through to the clinic on the phone ..... | <input type="radio"/> |
| 2. Convenience of our office hours .....                    | <input type="radio"/> |
| 3. Ease of scheduling your appointment .....                | <input type="radio"/> |
| 4. Courtesy of staff in the registration area .....         | <input type="radio"/> |

**Comments** (describe good or bad experience): \_\_\_\_\_  
 \_\_\_\_\_  
 \_\_\_\_\_

| <b>MOVING THROUGH YOUR VISIT</b>                            | very poor             | poor                  | fair                  | good                  | very good             |
|-------------------------------------------------------------|-----------------------|-----------------------|-----------------------|-----------------------|-----------------------|
|                                                             | <b>1</b>              | <b>2</b>              | <b>3</b>              | <b>4</b>              | <b>5</b>              |
| 1. Degree to which you were informed about any delays ..... | <input type="radio"/> |
| 2. Wait time at clinic (from arriving to leaving) .....     | <input type="radio"/> |

**Comments** (describe good or bad experience): \_\_\_\_\_  
 \_\_\_\_\_  
 \_\_\_\_\_

| <b>NURSE/ASSISTANT</b>                                            | very poor             | poor                  | fair                  | good                  | very good             |
|-------------------------------------------------------------------|-----------------------|-----------------------|-----------------------|-----------------------|-----------------------|
|                                                                   | <b>1</b>              | <b>2</b>              | <b>3</b>              | <b>4</b>              | <b>5</b>              |
| 1. Friendliness/courtesy of the nurse/assistant .....             | <input type="radio"/> |
| 2. Concern the nurse/assistant showed for your problem .....      | <input type="radio"/> |
| 3. Nurse/assistant promptness in returning your phone calls ..... | <input type="radio"/> |
| 4. Education provided by the nurse (if any) .....                 | <input type="radio"/> |

**Comments** (describe good or bad experience): \_\_\_\_\_  
 \_\_\_\_\_  
 \_\_\_\_\_

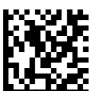

continued...

| <b>CARE PROVIDER</b> | very<br>poor | poor     | fair     | good     | very<br>good |
|----------------------|--------------|----------|----------|----------|--------------|
|                      | <b>1</b>     | <b>2</b> | <b>3</b> | <b>4</b> | <b>5</b>     |

**DURING YOUR VISIT, YOUR CARE WAS PROVIDED PRIMARILY BY A DOCTOR, PHYSICIAN ASSISTANT (PA), NURSE PRACTITIONER (NP), OR MIDWIFE. PLEASE ANSWER THE FOLLOWING QUESTIONS WITH THAT HEALTH CARE PROVIDER IN MIND.**

- |                                                                                         |                       |                       |                       |                       |                       |
|-----------------------------------------------------------------------------------------|-----------------------|-----------------------|-----------------------|-----------------------|-----------------------|
| 1. Friendliness/courtesy of the care provider .....                                     | <input type="radio"/> |
| 2. Explanations the care provider gave you about your problem or condition .....        | <input type="radio"/> |
| 3. Concern the care provider showed for your questions or worries .....                 | <input type="radio"/> |
| 4. Care provider's efforts to include you in decisions about your treatment .....       | <input type="radio"/> |
| 5. Information the care provider gave you about medications (if any) .....              | <input type="radio"/> |
| 6. Instructions the care provider gave you about follow-up care (if any) .....          | <input type="radio"/> |
| 7. Degree to which care provider talked with you using words you could understand ..... | <input type="radio"/> |
| 8. Amount of time the care provider spent with you .....                                | <input type="radio"/> |
| 9. Your confidence in this care provider .....                                          | <input type="radio"/> |
| 10. Likelihood of your recommending this care provider to others .....                  | <input type="radio"/> |

**Comments** (describe good or bad experience): \_\_\_\_\_  
 \_\_\_\_\_  
 \_\_\_\_\_

| <b>PERSONAL ISSUES</b> | very<br>poor | poor     | fair     | good     | very<br>good |
|------------------------|--------------|----------|----------|----------|--------------|
|                        | <b>1</b>     | <b>2</b> | <b>3</b> | <b>4</b> | <b>5</b>     |

- |                                                                                        |                       |                       |                       |                       |                       |
|----------------------------------------------------------------------------------------|-----------------------|-----------------------|-----------------------|-----------------------|-----------------------|
| 1. How well staff protected your safety (by washing hands, wearing gloves, etc.) ..... | <input type="radio"/> |
| 2. Our sensitivity to your needs .....                                                 | <input type="radio"/> |
| 3. Our concern for your privacy .....                                                  | <input type="radio"/> |
| 4. Cleanliness of our practice .....                                                   | <input type="radio"/> |
| 5. Response to concerns/complaints made during your visit .....                        | <input type="radio"/> |
| 6. How well your (the patient's) pain was controlled .....                             | <input type="radio"/> |

**Comments** (describe good or bad experience): \_\_\_\_\_  
 \_\_\_\_\_  
 \_\_\_\_\_

| <b>OVERALL ASSESSMENT</b> | very<br>poor | poor     | fair     | good     | very<br>good |
|---------------------------|--------------|----------|----------|----------|--------------|
|                           | <b>1</b>     | <b>2</b> | <b>3</b> | <b>4</b> | <b>5</b>     |

- |                                                                 |                       |                       |                       |                       |                       |
|-----------------------------------------------------------------|-----------------------|-----------------------|-----------------------|-----------------------|-----------------------|
| 1. How well the staff worked together to care for you .....     | <input type="radio"/> |
| 2. Likelihood of your recommending our practice to others ..... | <input type="radio"/> |
| 3. Overall rating of care received during your visit .....      | <input type="radio"/> |

**Comments** (describe good or bad experience): \_\_\_\_\_  
 \_\_\_\_\_  
 \_\_\_\_\_

Patient's Name: (optional) \_\_\_\_\_

Telephone Number: (optional) \_\_\_\_\_

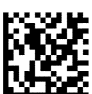

Supplement: mmc1.pdf [file mmc1.pdf]
